# Supplementary material for: Ecological and environmental controls on plant wax production and stable isotope fractionation in modern terrestrial Arctic vegetation
Source: Copernicus journal article supplement (doi:10.5194/egusphere-2025-3849), 2025-08-20
Supplement: Supplementary file 1 [file egusphere-2025-3849-supplement.pdf]

# ***Supplement of Ecological and environmental controls on plant wax production and stable isotope fractionation in modern terrestrial Arctic vegetation***

Kurt R. Lindberg<sup>1</sup>, Elizabeth K. Thomas<sup>1</sup>, Martha K. Raynolds<sup>2</sup>, Helga Bültmann<sup>3</sup>, and Jonathan H. Raberg<sup>4</sup>

<sup>1</sup>Department of Earth Sciences, University at Buffalo, Buffalo, NY, 14260, USA

<sup>2</sup>Institute of Arctic Biology, University of Alaska Fairbanks, Fairbanks, Alaska, 99775, USA

<sup>3</sup>Institute of Landscape Ecology, University of Münster, Münster, D-48149, Germany

<sup>4</sup>Department of Geology and Geophysics, University of Wyoming, Laramie, Wyoming, 82072, USA

**Correspondence:** Kurt R. Lindberg (kurtrlindberg@gmail.com)

## **1 Introduction**

This supplement contains Figures S1-S3 and Table S1.

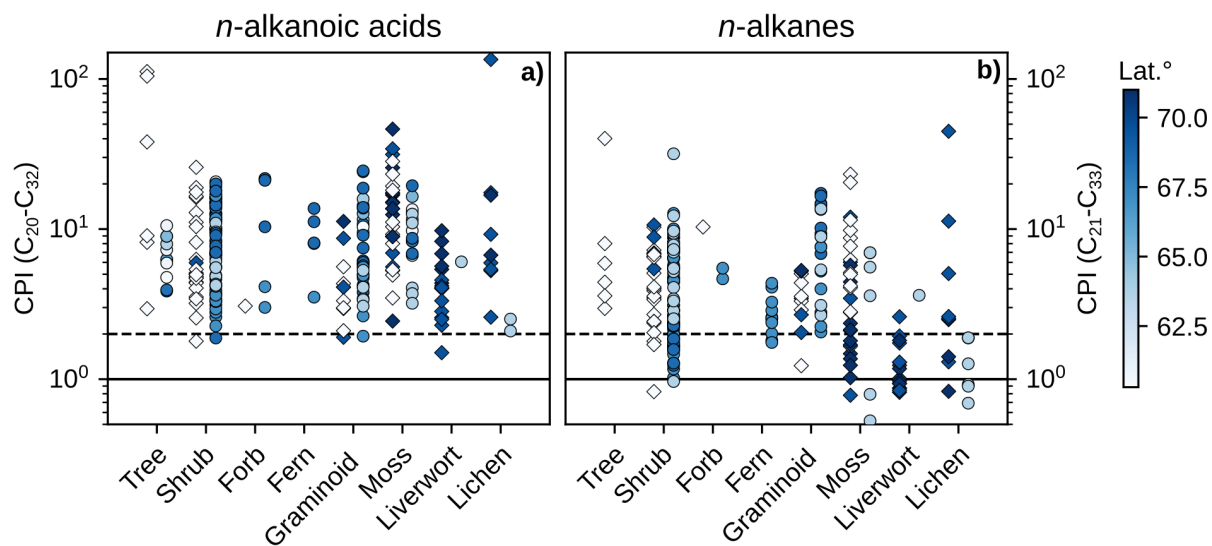

**Figure S1.** Scatterplots of plant wax Carbon Preference Index (CPI) results from this study (diamonds) and the pan-Arctic literature compilation (circles) grouped by plant growth form. (a) *n*-alkanoic acid CPI for carbon chain-lengths C<sub>20</sub> through C<sub>32</sub>. (b) *n*-alkane CPI for carbon chain-lengths C<sub>21</sub> through C<sub>33</sub>. Data points are shaded by sampling site latitude. Solid and dashed horizontal lines mark CPI values of 1 and 2, respectively.

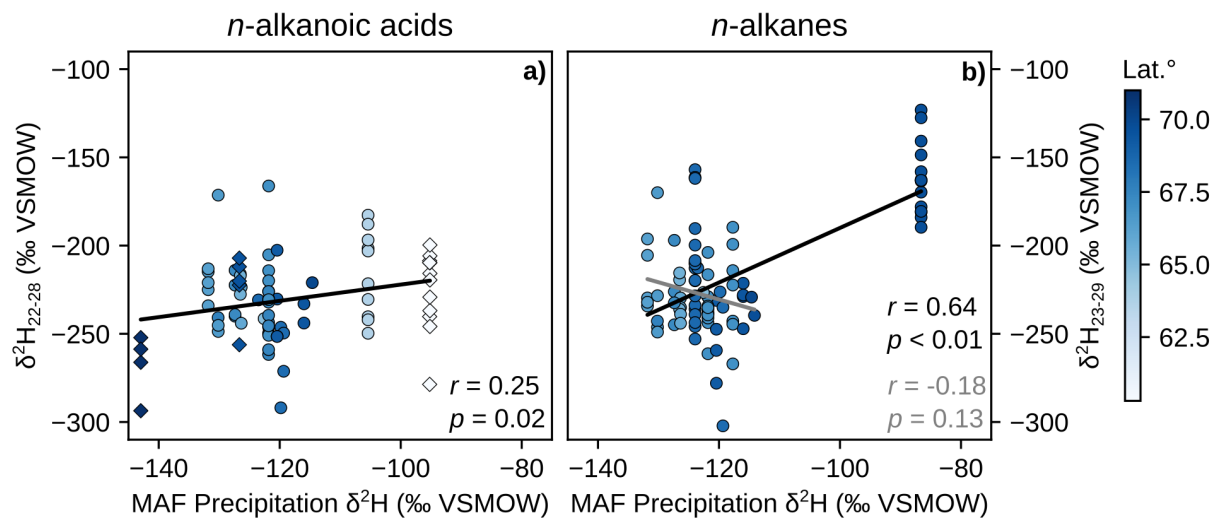

**Figure S2.** Scatterplots of plant wax  $\delta^2\text{H}$  from this study (diamonds) and the pan-Arctic data compilation (circles) vs. sample site MAF amount-weighted precipitation  $\delta^2\text{H}$ . (a) *n*-alkanoic acid  $\delta^2\text{H}$  (C<sub>22</sub>-C<sub>28</sub>). (b) *n*-alkane  $\delta^2\text{H}$  (C<sub>23</sub>-C<sub>29</sub>). Pearson correlation  $r$  and  $p$  values are shown in the bottom-right corner of each panel. Black lines represent linear regressions fit for all data points. The grey line in panel b represents the linear regression fit without the data from Hollabåttjønne Bog in northern Norway (Balascio et al., 2018). Data points are shaded by sampling site latitude.

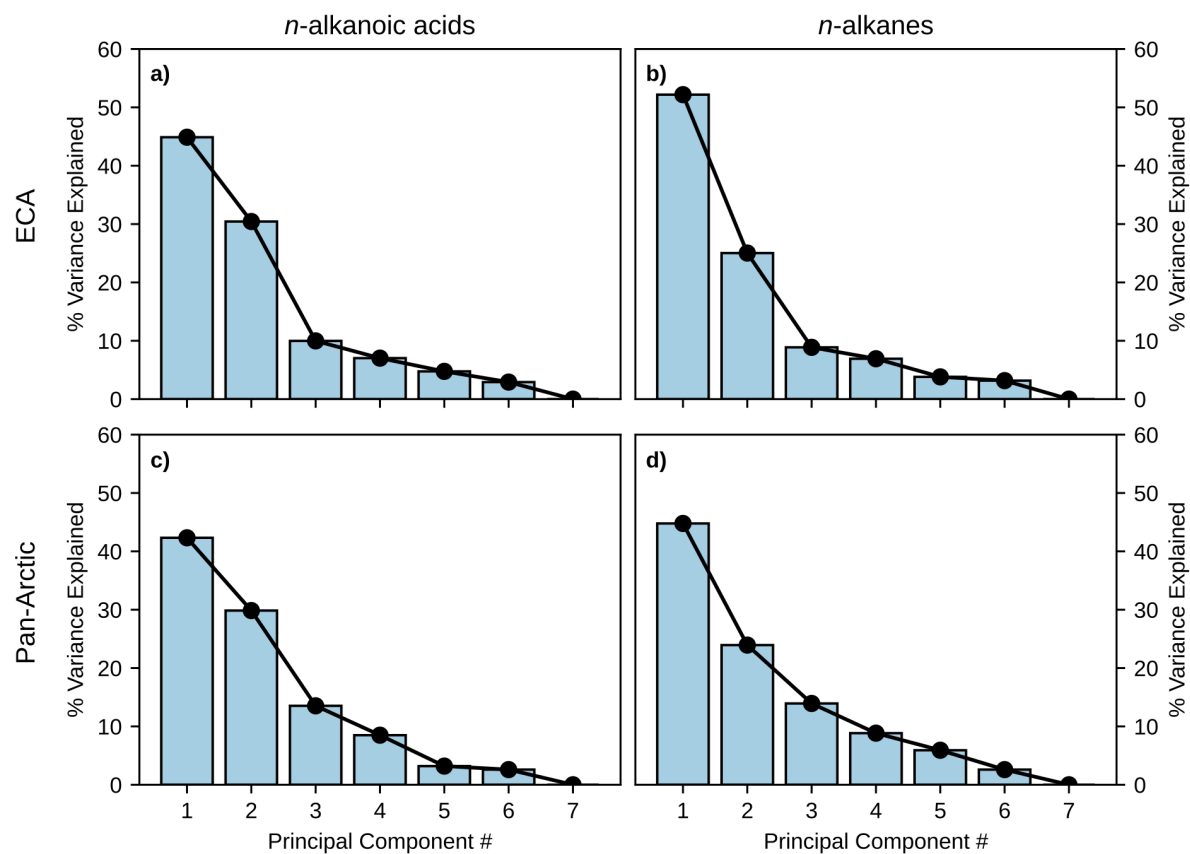

**Figure S3.** Scree plots of the percent variance explained by each principal component number. (a) ECA *n*-alkanoic acid PCA, (b) ECA *n*-alkane PCA, (c) pan-Arctic *n*-alkanoic acid PCA, (d) pan-Arctic *n*-alkane PCA. Panel lettering corresponds to that shown in Fig. 5.

**Table S1.** *P*-values of Shapiro-Wilk tests performed on each plant growth form for each plant wax data type by compound class. *P*-values  $\geq 0.05$  indicate that measurements within a plant growth form are normally distributed. Missing values (-) are due to a plant growth form not having enough measurements ( $n < 3$ ) of a plant wax data type.

| Growth Form | <i>n</i> -alkanoic acids |        |                       |                  | <i>n</i> -alkanes |       |                       |                  |
|-------------|--------------------------|--------|-----------------------|------------------|-------------------|-------|-----------------------|------------------|
|             | log Conc.                | ACL    | $\delta^{13}\text{C}$ | $\epsilon_{app}$ | log Conc.         | ACL   | $\delta^{13}\text{C}$ | $\epsilon_{app}$ |
| Tree        | 0.260                    | 0.376  | -                     | -                | 0.957             | 0.664 | -                     | -                |
| Shrub       | <0.001                   | <0.001 | 0.972                 | 0.049            | 0.389             | 0.023 | 0.926                 | <0.001           |
| Forb        | 0.475                    | 0.593  | -                     | 0.527            | 0.833             | 0.234 | -                     | 0.404            |
| Fern        | 0.538                    | 0.342  | -                     | -                | 0.043             | 0.011 | -                     | 0.778            |
| Graminoid   | 0.118                    | 0.859  | 0.421                 | 0.059            | 0.376             | 0.004 | 0.946                 | 0.279            |
| Moss        | 0.976                    | 0.628  | 0.593                 | 0.596            | 0.748             | 0.540 | -                     | 0.946            |
| Liverwort   | 0.857                    | 0.875  | 0.247                 | 0.705            | 0.752             | 0.114 | -                     | -                |
| Lichen      | 0.745                    | 0.309  | -                     | - 0.074          | 0.018             | -     | -                     | -                |

## References

- Balascio, N. L., D'Andrea, W. J., Anderson, R. S., and Wickler, S.: Influence of vegetation type on n-alkane composition and hydrogen isotope  
5 values from a high latitude ombrotrophic bog, *Organic Geochemistry*, 121, 48–57, <https://doi.org/10.1016/j.orggeochem.2018.03.008>, 2018.
